# Supplementary material for: Grain Yield and Gross Return above Fertilizer Cost with Parameters Relating to the Quality of White Rice Cultivated in Rainfed Paddy Fields in Cambodia
Source: MDPI journal article supplement (doi:10.3390/su141710708), 2022-08-28
Supplement: s1 [file s1]

**Supplementary Table S1.** Fertilizing rate in total, proportion of basal and top dressing, seeding rate or planting space, sowing date, harvesting date, precipitation, day length, temperature, fertilizer cost, paddy sales

| Province<br>Variety                                                                                                              | Fertilizer<br>(kg ha <sup>-1</sup> ) | Proportion of fertilizer<br>application<br>for basal and top dressing | Seeding rate (kg<br>ha <sup>-1</sup> )<br>/planting space | Sowing<br>(Transplanting) | Harvesting | Precipitation<br>during<br>cultivation<br>(mm) | Fertilizer cost<br>(US\$ ha <sup>-1</sup> ) | Paddy sales<br>(US\$ kg <sup>-1</sup> ) |
|----------------------------------------------------------------------------------------------------------------------------------|--------------------------------------|-----------------------------------------------------------------------|-----------------------------------------------------------|---------------------------|------------|------------------------------------------------|---------------------------------------------|-----------------------------------------|
| 1. Banteay Meanchey (day length: 12h55m16s - 11h22m59s; precipitation: 834.4mm; daily temp: 37.5°C max, 14.5°C min in Jun - Dec) |                                      |                                                                       |                                                           |                           |            |                                                |                                             |                                         |
| 44. Raing Chey                                                                                                                   | 32.0                                 | 50% BD; 50% TD                                                        | 120                                                       | Jul 20                    | Dec 20     | 666.0                                          | 17.5                                        | 0.200                                   |
| 46. Neang Khon                                                                                                                   | 32.0                                 | 50% BD; 50% TD                                                        | 120                                                       | Jul 14                    | Dec 15     | 666.0                                          | 17.5                                        | 0.200                                   |
| 49. Phka Knhy                                                                                                                    | 27.5                                 | 50% BD; 50% TD                                                        | 100                                                       | Jul 14                    | Dec 25     | 666.0                                          | 13.9                                        | 0.200                                   |
| 50. Srop Ngar                                                                                                                    | 116.5                                | 0% BD; 25% 1TD, 50% 2TD, 25% 3TD                                      | 120                                                       | Jul 9                     | Nov 15     | 666.0                                          | 56.4                                        | 0.200                                   |
| 51. Malis Chin                                                                                                                   | 116.5                                | 0% BD; 25% 1TD, 50% 2TD, 25% 3TD                                      | 100                                                       | Jul 12                    | Nov 12     | 666.0                                          | 56.4                                        | 0.225                                   |
| 45. Sen Kra Ob                                                                                                                   | 163.0                                | 50% BD; 25% 1TD, 25% 2TD                                              | 100                                                       | Aug 8                     | Nov 23     | 666.0                                          | 78.3                                        | 0.225                                   |
| 47. Phka Rumduol                                                                                                                 | 55.0                                 | 50% BD; 25% 1TD, 25% 2TD                                              | 100                                                       | Jul 10                    | Nov 15     | 666.0                                          | 22.6                                        | 0.225                                   |
| 48. IR504                                                                                                                        | 120.8                                | 0% BD; 40% 1TD, 30% 2TD, 30% 3TD                                      | 120                                                       | Sep 13                    | Dec 25     | 479.6                                          | 58.3                                        | 0.200                                   |
| 2. Battambang (day length: 12h52m56s - 11h25m7s; precipitation: 704.6mm; daily temp: 37.5°C max, 16.0°C min in Jun - Dec)        |                                      |                                                                       |                                                           |                           |            |                                                |                                             |                                         |
| 15. Phka Rumduol                                                                                                                 | 77.5                                 | 0% BD; 50% 1TD, 50% 2TD                                               | 140                                                       | Jul 9                     | Nov 14     | 646.3                                          | 38.2                                        | 0.319                                   |
| 16. Sen Kra Ob                                                                                                                   | 147.2                                | 0% BD; 30% 1TD, 40% 2TD, 30% 3TD                                      | 150                                                       | Sep 11                    | Dec 25     | 334.1                                          | 75.3                                        | 0.319                                   |
| 17. Malis Chin                                                                                                                   | 100.5                                | 0% BD; 40% 1TD, 40% 2TD, 20% 3TD                                      | 130                                                       | Jul 20                    | Nov 20     | 646.3                                          | 47.7                                        | 0.319                                   |
| 18. Srop Ngar                                                                                                                    | 104.3                                | 0% BD; 40% 1TD, 40% 2TD, 20% 3TD                                      | 180                                                       | Jul 17                    | Nov 23     | 646.3                                          | 52.9                                        | 0.209                                   |
| 19. CAR15                                                                                                                        | 109.1                                | 0% BD; 50% 1TD, 25% 2TD, 25% 3TD                                      | 150                                                       | Aug 22                    | Nov 27     | 470.2                                          | 50.5                                        | 0.209                                   |
| 21. Neang Khon                                                                                                                   | 71.0                                 | 20% BD; 40% 1TD, 40% 2TD                                              | 140                                                       | Jun 24                    | Dec 10     | 704.6                                          | 35.7                                        | 0.209                                   |
| 22. OM5451                                                                                                                       | 109.5                                | 0% BD; 40% 1TD, 40% 2TD, 20% 3TD                                      | 160                                                       | Aug 26                    | Dec 5      | 470.2                                          | 55.7                                        | 0.209                                   |
| 20. Raing Chey                                                                                                                   | 85.0                                 | 0% BD; 30% BD; 70% TD                                                 | 80, 25×25 cm                                              | Jun 10 (Jul 5)            | Dec 13     | 704.6                                          | 41.9                                        | 0.209                                   |
| 3. Kampong Thom (day length: 12h52m28s - 11h25m32s; precipitation: 804.6mm; daily temp: 37.0°C max, 17.0°C min in Jun - Dec)     |                                      |                                                                       |                                                           |                           |            |                                                |                                             |                                         |
| 8. OM5451                                                                                                                        | 195.0                                | 0% BD; 40% 1TD, 30% 2TD, 30% 3TD                                      | 150                                                       | Sep 23                    | Dec 27     | 402.6                                          | 95.8                                        | 0.217                                   |
| 13. CAR8                                                                                                                         | 0.0                                  |                                                                       | 90, 25×25 cm                                              | Jun 10 (Jul 18)           | Dec 20     | 687.7                                          | -                                           | 0.217                                   |
| 9. Phka Mealtey                                                                                                                  | 78.0                                 | 70% BD; 30% 1TD                                                       | 80, 20×20 cm                                              | Jul 20 (Aug 13)           | Nov 15     | 687.7                                          | 36.4                                        | 0.288                                   |
| 10. Raing Chey                                                                                                                   | 64.2                                 | 70% BD; 30% 1TD                                                       | 90, 25×25 cm                                              | Jul 18 (Aug 14)           | Dec 23     | 687.7                                          | 30.7                                        | 0.217                                   |
| 12. Phka Rumduol                                                                                                                 | 55.0                                 | 70% BD; 30% 1TD                                                       | 90, 20×20 cm                                              | Jul 10 (Aug 2)            | Nov 17     | 687.7                                          | 26.9                                        | 0.288                                   |
| 14. Phka Chan Sen                                                                                                                | 78.0                                 | 80% BD; 20% TD                                                        | 90, 25×25 cm                                              | Jul 15 (Aug 10)           | Dec 14     | 687.7                                          | 36.4                                        | 0.288                                   |
| Sar                                                                                                                              |                                      |                                                                       |                                                           |                           |            | 464.3                                          | 36.4                                        | 0.288                                   |
| 11. Sen Kra Ob                                                                                                                   | 78.0                                 | 50% BD; 25% 1TD, 25% 2TD                                              | 120                                                       | Aug 12                    | Nov 28     | 464.3                                          | 36.4                                        | 0.288                                   |
| 4. Pursat (day length: 12h50m31s - 11h27m20s; precipitation: 654.0mm; daily temp: 38.0°C max, 16.3°C min in Jun - Dec)           |                                      |                                                                       |                                                           |                           |            |                                                |                                             |                                         |
| 37. Somaly                                                                                                                       | 59.6                                 | 50% BD; 25% 1TD, 25% 2TD                                              | 130                                                       | Jul 13                    | Nov 15     | 543.5                                          | 28.8                                        | 0.254                                   |
| 38. Phka Rumduol                                                                                                                 | 94.2                                 | 0% BD; 50% 1TD, 50% 2TD                                               | 130                                                       | Jul 15                    | Nov 17     | 543.5                                          | 45.7                                        | 0.254                                   |
| 40. Sen Kra Ob                                                                                                                   | 101.0                                | 0% BD; 50% 1TD, 50% 2TD                                               | 120                                                       | Aug 10                    | Nov 25     | 455.2                                          | 45.8                                        | 0.254                                   |
| 42. Phka Doung                                                                                                                   | 55.0                                 | 0% BD; 100% TD                                                        | 90, 25×25 cm                                              | Jun 14 (Jul 5)            | Nov 15     | 652.4                                          | 26.9                                        | 0.254                                   |
| 43. Neang Ek                                                                                                                     | 55.0                                 | 50% BD; 50%TD                                                         | 90, 30×30 cm                                              | Jun 20 (Jul 10)           | Dec 13     | 654.0                                          | 26.9                                        | 0.254                                   |
| 39. Krasang Teap                                                                                                                 | 59.6                                 | 50% BD; 50%TD                                                         | 140                                                       | Jul 15                    | Dec 16     | 545.1                                          | 28.8                                        | 0.188                                   |
| 41. CAR9                                                                                                                         | 0.0                                  |                                                                       | 130                                                       | Jun 12                    | Dec 20     | 654.0                                          | -                                           | 0.188                                   |
| 5. Siem Reap (day length: 12h55m21s - 11h22m54s; precipitation: 1299.5mm; daily temp: 36.5°C max, 16.5°C min in Jun - Dec)       |                                      |                                                                       |                                                           |                           |            |                                                |                                             |                                         |
| 85. Phka Malis                                                                                                                   | 0.0                                  |                                                                       | 130                                                       | Jul 15                    | Nov 20     | 1059.1                                         | -                                           | 0.282                                   |
| 86. Phka Rumdeng                                                                                                                 | 59.5                                 | 50% BD; 50%TD                                                         | 130                                                       | Jun 12                    | Nov 15     | 1299.5                                         | 31.3                                        | 0.282                                   |
| 87. Somaly                                                                                                                       | 64.0                                 | 100% BD                                                               | 130                                                       | Jul 20                    | Nov 18     | 1059.1                                         | 34.0                                        | 0.282                                   |
| 88. Phka Rumduol                                                                                                                 | 0.0                                  | 100% BD                                                               | 130                                                       | Jul 12                    | Nov 14     | 1059.1                                         | -                                           | 0.282                                   |
| 83. OM5451                                                                                                                       | 160.0                                | 40% BD; 20% 1TD, 40% 2TD                                              | 250                                                       | Aug 10                    | Nov 15     | 915.0                                          | 87.5                                        | 0.225                                   |
| 82. Sen Pidao                                                                                                                    | 27.5                                 | 0% BD; 100% TD                                                        | 90, 20×20 cm                                              | Aug 10 (Aug 30)           | Nov 29     | 915.0                                          | 13.9                                        | 0.282                                   |
| 84. Sen Kra Ob                                                                                                                   | 160.0                                | 40% BD; 20% 1TD, 40% 2TD                                              | 90, 20×20 cm                                              | Aug 15 (Sep 5)            | Nov 30     | 915.0                                          | 87.5                                        | 0.282                                   |
| 6. Kampong Chhnang (day length: 12h49m42s - 11h28m6s; precipitation: 894.7mm; daily temp: 37.0°C max, 17.0°C min in Jun - Dec)   |                                      |                                                                       |                                                           |                           |            |                                                |                                             |                                         |
| 53. OM5451                                                                                                                       | 87.0                                 | 50% BD; 50%TD                                                         | 250                                                       | Jul 7                     | Oct 14     | 702.0                                          | 44.4                                        | 0.205                                   |
| 58. IR504                                                                                                                        | 46.0                                 | 50% 1TD, 50% 2TD                                                      | 250                                                       | Aug 10                    | Nov 25     | 500.4                                          | 18.9                                        | 0.205                                   |
| 52. Phka Rumduol                                                                                                                 | 87.0                                 | 50% BD; 50%TD                                                         | 80, 20×20 cm                                              | Jul 13 (Aug 9)            | Nov 17     | 706.8                                          | 44.4                                        | 0.285                                   |
| 54. Sen Kra Ob                                                                                                                   | 87.0                                 | 50% BD; 50%TD                                                         | 100, 20×20 cm                                             | Aug 9 (Sep 5)             | Nov 24     | 500.4                                          | 44.4                                        | 0.285                                   |
| 57. Phka Chan Sen                                                                                                                | 55.0                                 | 50% BD; 50%TD                                                         | 80, 20×20 cm                                              | Jun 11                    | Dec 20     | 894.7                                          | 27.7                                        | 0.285                                   |
| Sar                                                                                                                              |                                      |                                                                       |                                                           |                           |            | 894.7                                          | 27.7                                        | 0.285                                   |
| 59. CAR15                                                                                                                        | 55.0                                 | 100% BD                                                               | 100, 20×20 cm                                             | Aug 10                    | Nov 25     | 500.4                                          | 27.7                                        | 0.205                                   |
| 56. Raing Chey                                                                                                                   | 23.0                                 | 0% BD; 100% TD                                                        | 160                                                       | Jul 10                    | Dec 17     | 706.8                                          | 9.4                                         | 0.205                                   |
| 55. Neang Krim                                                                                                                   | 41.0                                 | 50% BD; 25& 1TD, 25% 2TD                                              | 80, 20×20 cm                                              | Jul 14 (Aug 7)            | Dec 15     | 706.8                                          | 18.5                                        | 0.205                                   |
| 7. Kampong Speu (day length: 12h47m48s - 11h29m50s; precipitation: 893.5mm; daily temp: 37.5°C max, 17.0°C min in Jun - Dec)     |                                      |                                                                       |                                                           |                           |            |                                                |                                             |                                         |
| 68. Kong Chheng                                                                                                                  | 67.8                                 | 50% BD; 50%TD                                                         | 120                                                       | Jul 9                     | Dec 15     | 774.0                                          | 33.9                                        | 0.210                                   |
| 69. Chulasa                                                                                                                      | 98.5                                 | 50% BD; 50%TD                                                         | 100                                                       | Sep 15                    | Dec 23     | 542.5                                          | 49.1                                        | 0.210                                   |
| 70. Ka Ngork                                                                                                                     | 96.2                                 | 50% BD; 50%TD                                                         | 120                                                       | Jul 26                    | Dec 25     | 774.0                                          | 48.2                                        | 0.210                                   |
| Pong                                                                                                                             |                                      |                                                                       |                                                           |                           |            | 774.0                                          | 48.2                                        | 0.210                                   |
| 71. Sen Kra Ob                                                                                                                   | 87.0                                 | 40% BD; 30% 1TD, 30% 2TD                                              | 70, 25×25 cm                                              | Sep 15 (Oct 5)            | Dec 28     | 542.5                                          | 44.4                                        | 0.305                                   |
| 72. Phka Rumduol                                                                                                                 | 48.2                                 | 50% BD; 50%TD                                                         | 80, 25×25 cm                                              | Jul 11 (Aug 4)            | Nov 17     | 774.0                                          | 22.2                                        | 0.305                                   |
| 74. Phka Malis                                                                                                                   | 84.4                                 | 40% BD; 30% 1TD, 30% 2TD                                              | 120                                                       | Jul 15                    | Nov 20     | 774.0                                          | 39.8                                        | 0.305                                   |
| 73. Smar Prum                                                                                                                    | 67.8                                 | 40% BD; 30% 1TD, 30% 2TD                                              | 70, 20×20 cm                                              | Jul 13 (Aug 7)            | Dec 18     | 774.0                                          | 33.9                                        | 0.210                                   |
| 8. Kampot (day length: 12h44m40s - 11h32m43s; precipitation: 1820.5mm; daily temp: 35.3°C max, 21.9°C min in Jun - Dec)          |                                      |                                                                       |                                                           |                           |            |                                                |                                             |                                         |
| 1. Phka Rumduol                                                                                                                  | 126.0                                | 50% BD; 25% 1TD, 25% 2TD                                              | 130                                                       | Jul 13                    | Nov 16     | 1607.3                                         | 63.0                                        | 0.295                                   |
| 2. Phka Malis                                                                                                                    | 126.0                                | 50% BD; 25% 1TD, 25% 2TD                                              | 130                                                       | Jul 16                    | Nov 15     | 1607.3                                         | 63.0                                        | 0.295                                   |
| 3. Sen Pidao                                                                                                                     | 110.0                                | 50% BD; 25% 1TD, 25% 2TD                                              | 150                                                       | Aug 10                    | Nov 23     | 1819.5                                         | 55.4                                        | 0.295                                   |
| 4. Krochork                                                                                                                      | 89.0                                 | 50% BD; 25% 1TD, 25% 2TD                                              | 150                                                       | Jun 16                    | Dec 14     | 1820.5                                         | 42.7                                        | 0.212                                   |
| Chab                                                                                                                             |                                      |                                                                       |                                                           |                           |            | 1820.5                                         | 42.7                                        | 0.212                                   |
| 5. Phka Romeat                                                                                                                   | 89.0                                 | 50% BD; 25% 1TD, 25% 2TD                                              | 130                                                       | Jun 15                    | Nov 17     | 1819.5                                         | 42.7                                        | 0.295                                   |
| 6. Pong Rolork                                                                                                                   | 89.0                                 | 50% BD; 25% 1TD, 25% 2TD                                              | 140                                                       | Jun 15                    | Dec 20     | 1820.5                                         | 42.7                                        | 0.212                                   |
| 7. Malis Chin                                                                                                                    | 89.0                                 | 50% BD; 25% 1TD, 25% 2TD                                              | 130                                                       | Jul 16                    | Nov 16     | 1607.3                                         | 42.7                                        | 0.295                                   |
| 9. Kampong Cham (day length: 12h52m28s - 11h25m32s; precipitation: 881.1mm; daily temp: 37.7°C max, 18.0°C min in Jun - Dec)     |                                      |                                                                       |                                                           |                           |            |                                                |                                             |                                         |
| 91. Raing Chey                                                                                                                   | 46.0                                 | 0% BD; 50% 1TD, 50% 2TD                                               | 140                                                       | Jun 12                    | Dec 15     | 881.1                                          | 18.9                                        | 0.209                                   |

|                                                                                                                               |       |                                   |               |                |         |        |       |       |
|-------------------------------------------------------------------------------------------------------------------------------|-------|-----------------------------------|---------------|----------------|---------|--------|-------|-------|
| 93. CAR6                                                                                                                      | 46.0  | 0% BD; 50% 1TD, 50% 2TD           | 150           | Jun 10         | Dec 20  | 881.1  | 18.9  | 0.209 |
| 94. Phka Rumduol                                                                                                              | 23.0  | 0% BD; 100% TD                    | 130           | Jul 12         | Nov 15  | 881.1  | 9.4   | 0.291 |
| 89. IR66                                                                                                                      | 23.0  | 0% BD; 100% TD                    | 180           | Aug 25         | Nov 27  | 556.9  | 9.4   | 0.209 |
| 90. Sen Kra Ob                                                                                                                | 23.0  | 0% BD; 100% TD                    | 80, 25×25 cm  | Aug 15 (Sep 5) | Nov 25  | 556.9  | 9.4   | 0.291 |
| 92. OM5451                                                                                                                    | 46.0  | 0% BD; 50% 1TD, 50% 2TD           | 200           | Aug 11         | Nov 20  | 556.9  | 18.9  | 0.209 |
| 10. Tboung Khmum (day length: 12h48m47s - 11h28m55s; precipitation: 1204.2mm; daily temp:35.8°C max, 18.0°C min in Jun - Dec) |       |                                   |               |                |         |        |       |       |
| 75. IR504                                                                                                                     | 27.6  | 50% BD; 50% TD                    | 180           | Aug 16         | Dec 3   | 495.9  | 11.3  | 0.208 |
| 77. CAR9                                                                                                                      | 40.2  | 50% BD; 50% TD                    | 150           | Jun 13         | Dec 19  | 1204.2 | 16.5  | 0.208 |
| 80. CAR15                                                                                                                     | 55.0  | 50% BD; 50% TD                    | 150           | Aug 20         | Nov 27  | 727.1  | 26.9  | 0.208 |
| 76. Thmor Krim                                                                                                                | 23.0  | 0% BD; 100% TD                    | 100, 25×25 cm | Jul 12 (Aug 8) | Nov 17  | 952.1  | 9.4   | 0.208 |
| 78. Phka Rumduol                                                                                                              | 61.9  | 50% BD; 50% TD                    | 90, 25×25 cm  | Jul 15 (Aug 5) | Nov 18  | 952.1  | 29.7  | 0.290 |
| 79. Raing Chey                                                                                                                | 27.6  | 0% BD; 100% TD                    | 90, 25×25 cm  | Jul 10 (Aug 5) | Dec 21  | 963.6  | 11.3  | 0.208 |
| 81. Sen Kra Ob                                                                                                                | 55.0  | 50% BD; 50% TD                    | 90, 25×25 cm  | Aug 15 (Sep 5) | Dec 5   | 738.6  | 26.9  | 0.290 |
| 11. Kandal (day length: 12h46m23s - 11h31m7s; precipitation: 1289.2mm; daily temp:36.9°C max, 18.9°C min in Jun - Dec)        |       |                                   |               |                |         |        |       |       |
| 32. CAR4                                                                                                                      | 27.5  | 0% BD; 100% TD                    | 70            | Jun 13         | Dec 15  | 1289.2 | 13.5  | 0.211 |
| 33. Angkareach                                                                                                                | 0.0   |                                   | 90            | Jun 15         | Dec 13  | 1289.2 | -     | 0.211 |
| 34. Phka Rumduol                                                                                                              | 23.0  | 0% BD; 100% TD                    | 150           | Jun 15         | Nov 15  | 1289.2 | 9.4   | 0.299 |
| 35. Raing Chey                                                                                                                | 23.0  | 0% BD; 100% TD                    | 60, 30×30 cm  | Jun 15 (Jul 3) | Dec 15  | 1289.2 | 9.4   | 0.211 |
| 31. OM5451                                                                                                                    | 104.6 | 0% BD; 100% TD                    | 200           | Aug 17         | Nov 25  | 849.4  | 49.0  | 0.211 |
| 36. IR504                                                                                                                     | 78.0  | 0% BD; 100% TD                    | 200           | Aug 20         | Dec 5   | 849.4  | 36.4  | 0.211 |
| 12. Takeo (day length: 12h45m20s - 11h32m6s; precipitation (Jun - Dec): 1096.4mm; daily temp:36.0°C max, 17.0°C min)          |       |                                   |               |                |         |        |       |       |
| 95. IR504                                                                                                                     | 45.0  | 25% BD; 25% 1TD, 25% 2TD, 25% 3TD | 250           | Jun 15         | Oct 2   | 1045.0 | 22.7  | 0.230 |
| 97. Sen Kra Ob                                                                                                                | 68.5  | 0% BD; 30% 1TD, 40% 2TD, 30% 3TD  | 130           | Aug 15         | Dec 2   | 801.2  | 30.2  | 0.271 |
| 98. Raing Chey                                                                                                                | 50.5  | 0% BD; 30% 1TD, 40% 2TD, 30% 3TD  | 100           | Jul 10         | Dec 20  | 969.6  | 23.3  | 0.271 |
| 99. Tror Norng                                                                                                                | 161.0 | 25% BD; 25% 1TD, 25% 2TD, 25% 3TD | 180           | Jun 10         | Dec 10  | 1096.4 | 75.8  | 0.230 |
| 96. Phka Rumduol                                                                                                              | 55.0  | 25% BD; 25% 1TD, 25% 2TD, 25% 3TD | 80, 20×20 cm  | Jul 13 (Aug 5) | Nov 17  | 969.6  | 22.6  | 0.271 |
| 100. OM5451                                                                                                                   | 50.5  | 0% BD; 30% 1TD, 40% 2TD, 30% 3TD  | 250           | Jul 7          | Oct 13  | 918.2  | 23.3  | 0.230 |
| 13. Prey Veng (day length: 12h46m57s - 11h30m37s; precipitation:1066.8mm; daily temp:35.7°C max, 18.2°C min in Jun - Dec)     |       |                                   |               |                |         |        |       |       |
| 23. IR504                                                                                                                     | 165.0 | 0% BD; 30% 1TD, 30% 2TD, 40% 3TD  | 250           | Aug 17         | Dec 5   | 665.6  | 83.1  | 0.226 |
| 24. Krasing Teap                                                                                                              | 63.0  | 50% BD; 20% 1TD, 30% 2TD          | 150           | Jul 10         | Dec 14  | 746.6  | 29.6  | 0.226 |
| 25. OM5451                                                                                                                    | 63.0  | 0% BD; 30% 1TD, 30% 2TD, 40% 3TD  | 250           | Jul 20         | Oct 27  | 683.6  | 29.6  | 0.226 |
| 26. Sen Kra Ob                                                                                                                | 72.2  | 0% BD; 20% 1TD, 35% 2TD, 45% 3TD  | 200           | Jun 8          | Sept 23 | 708.6  | 33.4  | 0.288 |
| 28. Raing Chey                                                                                                                | 67.3  | 0% BD; 100% TD                    | 100           | Jul 15         | Dec 15  | 746.6  | 31.4  | 0.226 |
| 29. Ka Ngork                                                                                                                  | 70.5  | 0% BD; 50% 1TD, 50% 2TD           | 150           | Aug 13         | Dec 16  | 665.6  | 33.4  | 0.226 |
| Pong                                                                                                                          |       |                                   |               |                |         | 746.4  |       |       |
| 27. Phka Rumduol                                                                                                              | 163.0 | 50% BD; 20% 1TD, 30% 2TD          | 80, 20×20 cm  | Jul 9          | Nov 15  | 1003.8 | 78.3  | 0.288 |
| 30. CAR 15                                                                                                                    | 163.0 | 0% BD; 50% 1TD, 50% 2TD           | 100, 20×20 cm | Jun 20         | Oct 5   | 1003.8 | 78.3  | 0.226 |
| 14. Svay Rieng (day length: 12h46m6s - 11h31m24s; precipitation:1299.5mm; daily temp:37.5°C max, 18.5°C min in Jun - Dec)     |       |                                   |               |                |         |        |       |       |
| 60. Raing Chey                                                                                                                | 89.5  | 0% BD; 40% 1TD, 30% 2TD, 30% 3TD  | 150           | Jul 10         | Dec 20  | 1069.5 | 41.8  | 0.293 |
| 61. IR504                                                                                                                     | 204.0 | 0% BD; 40% 1TD, 30% 2TD, 30% 3TD  | 250           | Aug 10         | Nov 25  | 828.0  | 105.4 | 0.233 |
| 62. Phka Ampil                                                                                                                | 89.5  | 0% BD; 40% 1TD, 30% 2TD, 30% 3TD  | 150           | Jul 15         | Nov 20  | 1068.5 | 41.8  | 0.293 |
| 63. Phka Rumduol                                                                                                              | 75.0  | 0% BD; 50% 1TD, 50% 2TD           | 150           | Jul 11         | Nov 16  | 1068.5 | 35.9  | 0.293 |
| 64. Jasmine 85                                                                                                                | 191.0 | 30% BD; 30% 1TD, 30% 2TD, 10% 3TD | 200           | Aug 10         | Nov 25  | 828.0  | 90.8  | 0.233 |
| 65. Krasang Teap                                                                                                              | 105.5 | 50% BD; 25% 1TD, 25% 2TD          | 150           | Jul 10         | Dec 15  | 1069.5 | 51.0  | 0.233 |
| 66. OM5451                                                                                                                    | 191.0 | 40% BD; 25% 1TD, 25% 2TD, 10% 3TD | 200           | Aug 10         | Nov 20  | 828.0  | 90.8  | 0.233 |
| 67. Sen Kra Ob                                                                                                                | 105.5 | 0% BD; 40% 1TD, 30% 2TD, 30% 3TD  | 150           | Jul 3          | Oct 20  | 1006.9 | 51.0  | 0.293 |

**Supplementary Table S2.** Precipitation (mm) during cultivation season of rainfed rice (2019)

| Province            | Jun   | Jul   | Aug   | Sep   | Oct   | Nov   | Dec  | Total  |
|---------------------|-------|-------|-------|-------|-------|-------|------|--------|
| 1. Banteay Meanchey | 168.4 | 88.2  | 98.2  | 432.4 | 39.7  | 7.5   | 0.0  | 834.4  |
| 2. Battambang       | 58.3  | 176.1 | 136.1 | 192.4 | 132.5 | 9.2   | 0.0  | 704.6  |
| 3. Kampong Thom     | 116.9 | 223.4 | 61.7  | 252.8 | 135.2 | 14.6  | 0.0  | 804.6  |
| 4. Pursat           | 108.9 | 88.3  | 124.1 | 184.2 | 126.4 | 20.5  | 1.6  | 654.0  |
| 5. Siem Reap        | 240.4 | 144.1 | 302.1 | 483.6 | 101.9 | 27.4  | 0.0  | 1299.5 |
| 6. Kampong Chhnang  | 187.9 | 206.4 | 117.9 | 319.7 | 58.0  | 4.8   | 0.0  | 894.7  |
| 7. Kampong Speu     | 119.5 | 85.0  | 146.5 | 209.5 | 278.0 | 55.0  | 0.0  | 893.5  |
| 8. Kampot           | 212.2 | 196.5 | 711.4 | 362.2 | 190.8 | 146.4 | 1.0  | 1820.5 |
| 9. Kampong Cham     | 156.3 | 167.9 | 199.7 | 216.8 | 81.8  | 58.6  | 0.0  | 881.1  |
| 10. Tboung Khmum    | 240.6 | 225.0 | 242.7 | 300.5 | 104.2 | 79.7  | 11.5 | 1204.2 |
| 11. Kandal          | 302.2 | 137.6 | 187.5 | 291.5 | 247.0 | 123.4 | 0.0  | 1289.2 |
| 12. Takeo           | 126.8 | 168.4 | 226.0 | 358.0 | 165.8 | 51.4  | 0.0  | 1096.4 |
| 13. Prey Veng       | 320.2 | 81.0  | 141.8 | 165.6 | 295.2 | 62.8  | 0.2  | 1066.8 |
| 14. Svay Rieng      | 164.1 | 240.5 | 175.0 | 262.3 | 329.1 | 61.6  | 1.0  | 1233.6 |
